# Supplementary material for: ON/OFF Photostimulation of Isatin Bipyridyl Hydrazones: Photochemical and Spectral Study
Source: MDPI journal article supplement (doi:10.3390/molecules24142668), 2019-07-23
Supplement: s1 [file s1]

## ON/OFF Photostimulation of Isatin Bipyridyl Hydrazones. Photochemical and Spectral Study.

Róbert Šandrik <sup>1</sup>, Pavol Tisovský <sup>1,\*</sup>, Klaudia Csicsai <sup>1</sup>, Jana Donovalová <sup>1</sup>, Martin Gáplovský <sup>2</sup>,  
Róbert Sokolík <sup>1</sup>, Juraj Filo <sup>1</sup>, Anton Gáplovský <sup>1</sup>

<sup>1</sup>Faculty of Natural Sciences, Institute of Chemistry, Comenius University, Ilkovičova 6,  
Mlynská dolina CH-2, SK-842 15 Bratislava, Slovakia;

<sup>2</sup>Department of Pharmaceutical Chemistry, Faculty of Pharmacy, Comenius University, Odbojárov 10, SK-832 32  
Bratislava

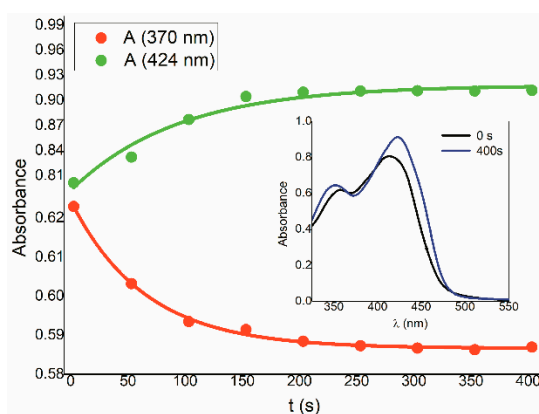

**Figure S1.** Hydrazone **4** kinetics of heat-stimulated *E-Z* isomerization ( $5 \times 10^{-5}$  mol dm<sup>-3</sup>) at 80 °C in DMF. In set hydrazone **4** UV-Vis spectra during isomerization.

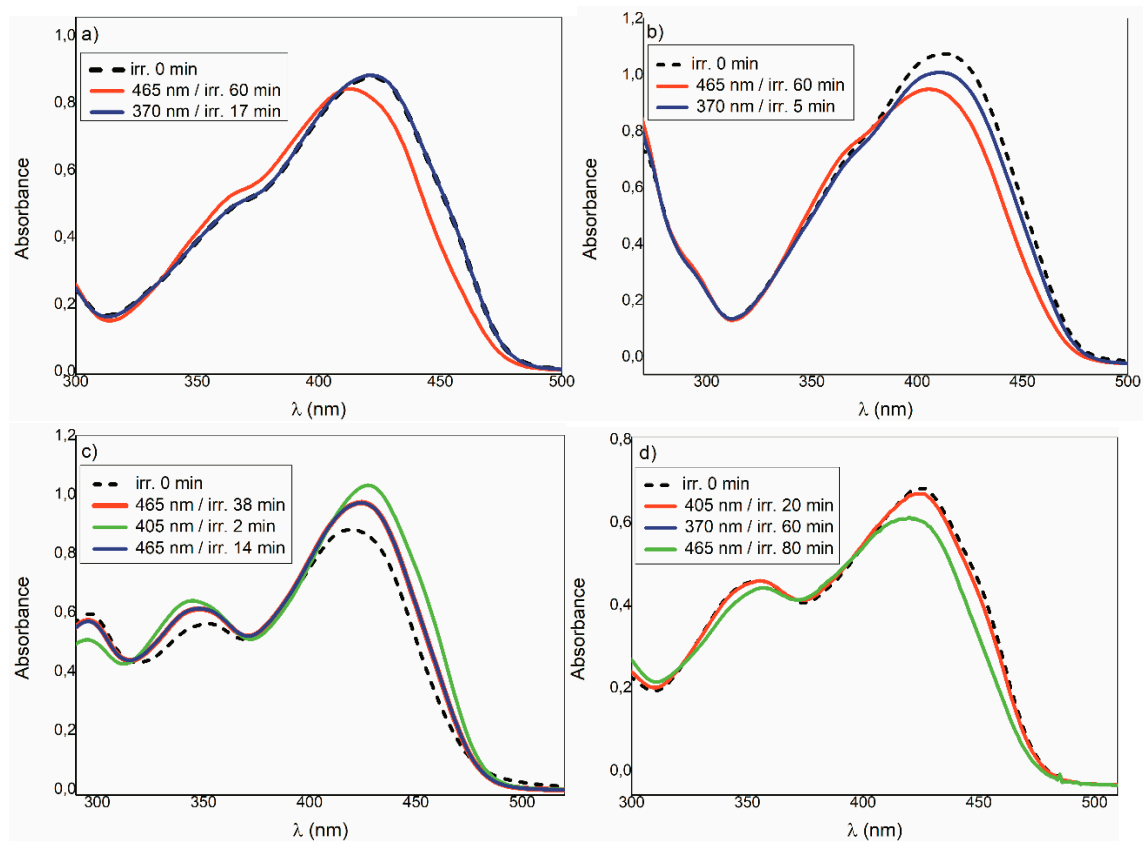

**Figure S2.** UV-Vis spectra change during irradiation: (a) hydrazone 3 ( $5 \times 10^{-5} \text{ mol dm}^{-3}$ ) in  $\text{CHCl}_3$ ; (b) hydrazone 3 ( $5 \times 10^{-5} \text{ mol dm}^{-3}$ ) in DMF; (c) hydrazone 4 ( $1 \times 10^{-4} \text{ mol dm}^{-3}$ ) in  $\text{CHCl}_3$ ; (d) hydrazone 4 ( $1 \times 10^{-4} \text{ mol dm}^{-3}$ ) in DMF.

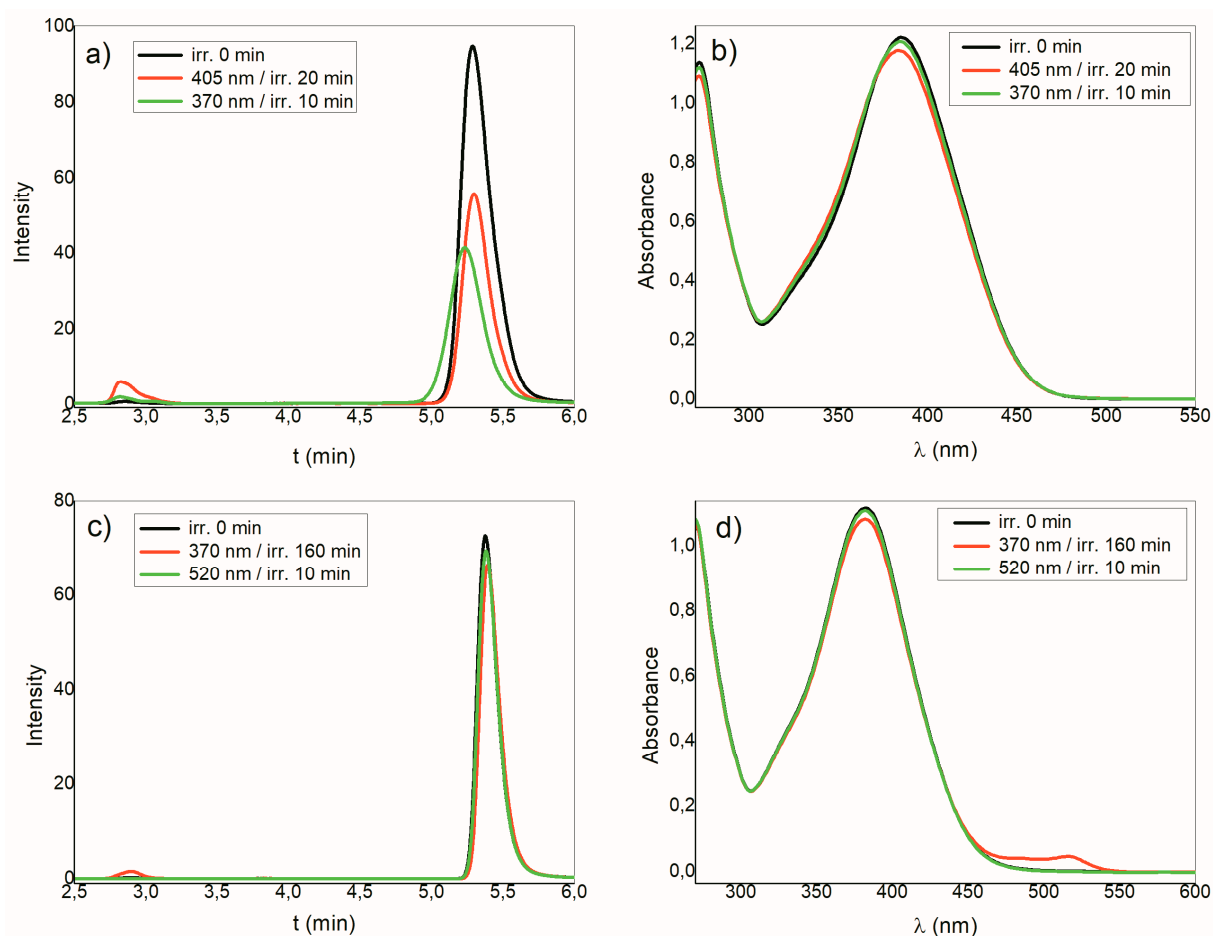

**Figure S3.** UV-Vis spectra and chromatograms change during hydrazone 2 ( $5 \times 10^{-5} \text{ mol dm}^{-3}$ ) photolysis: (a) and (b) photolysis in  $\text{CHCl}_3$ ; (c) and (d) photolysis in DMF.

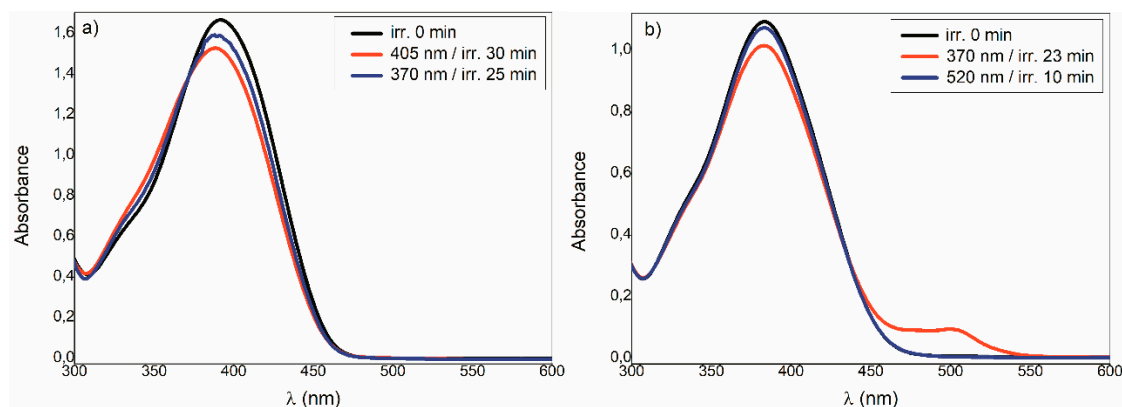

**Figure S4.** UV-Vis spectrum change: (a) hydrazone 1 ( $1 \times 10^{-4} \text{ mol dm}^{-3}$ ) a light-stimulated change in  $\text{CHCl}_3$ ; (b) hydrazone 1 ( $5 \times 10^{-5} \text{ mol dm}^{-3}$ ) reversible light-stimulated change in DMF.

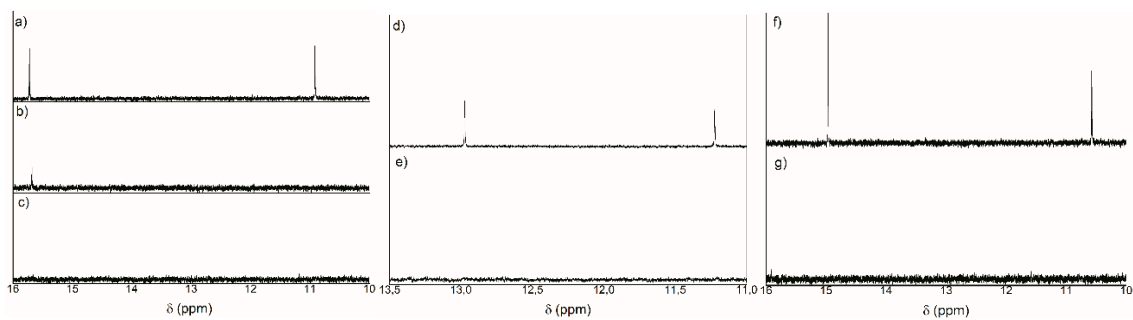

**Figure S5.** H-D exchange in DMSO: (a) hydrazone **3**; (b) solution a + D<sub>2</sub>O; (c) solution b after 24 h; (d) hydrazone **1**; (e) solution d + D<sub>2</sub>O; (f) hydrazone **4**; (g) solution f + D<sub>2</sub>O.

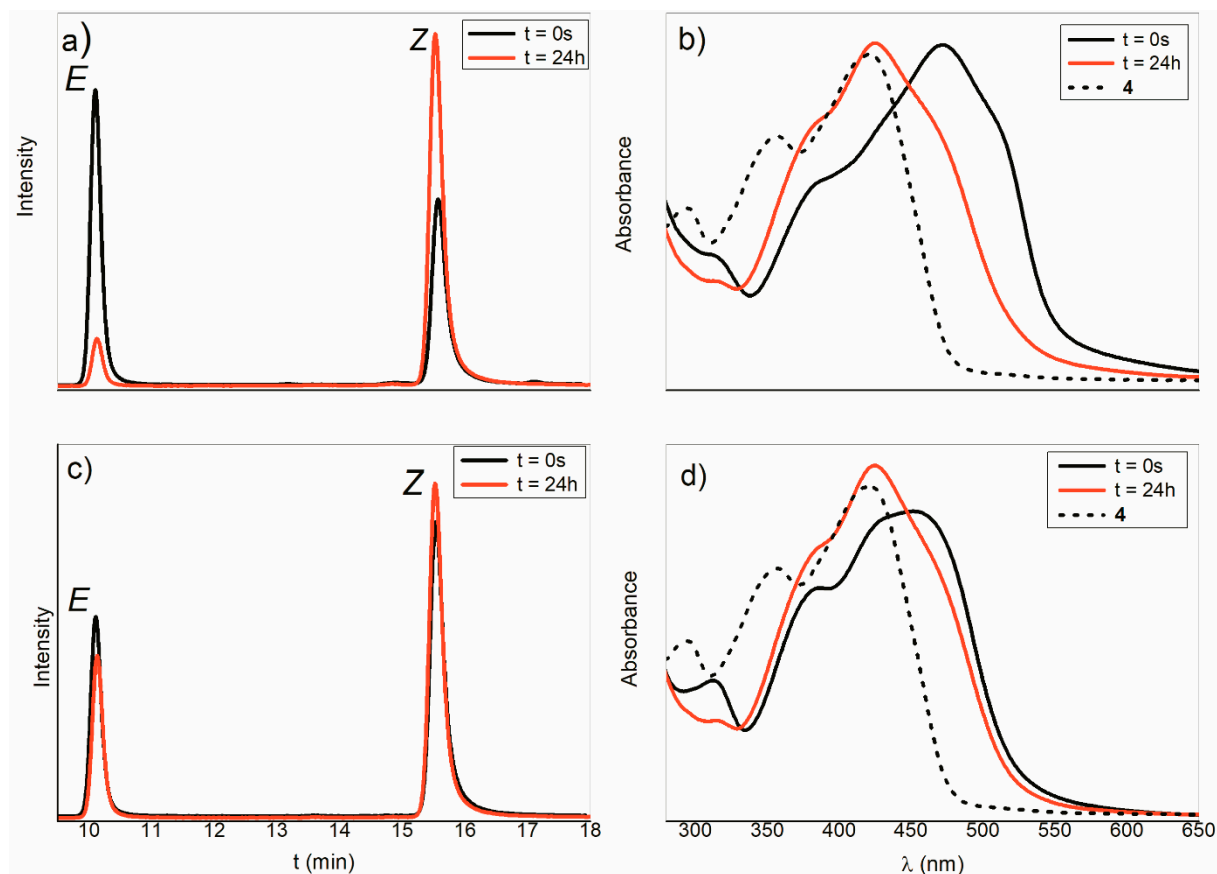

**Figure S6.** Thermic change of hydrazone **4** ( $1 \times 10^{-4} \text{ mol dm}^{-3}$ ) in the TBAF presence: (a), (c) chromatogram -  $c_{\text{TBAF}} = 5 \times 10^{-3} \text{ mol dm}^{-3}$ ; (b), (d) UV-Vis spectra -  $c_{\text{TBAF}} = 4 \times 10^{-4} \text{ mol dm}^{-3}$  in DMF.

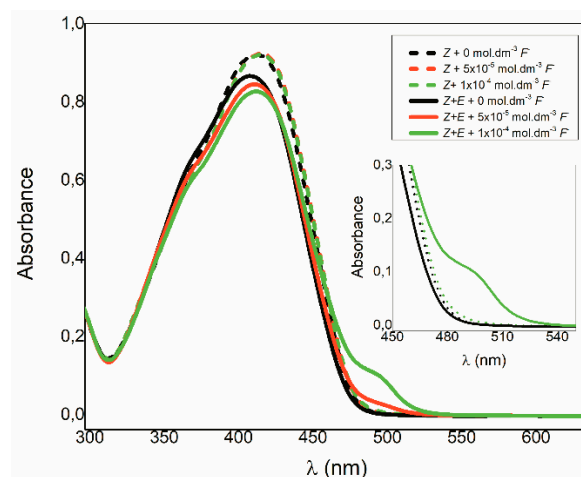

**Figure S7.** UV Vis spectra change of the *Z*-isomer and an *E* and *Z*-isomers mixture of the hydrazone 3 ( $5 \times 10^{-5} \text{ mol dm}^{-3}$ ) depending on the TBAF concentration in DMF.

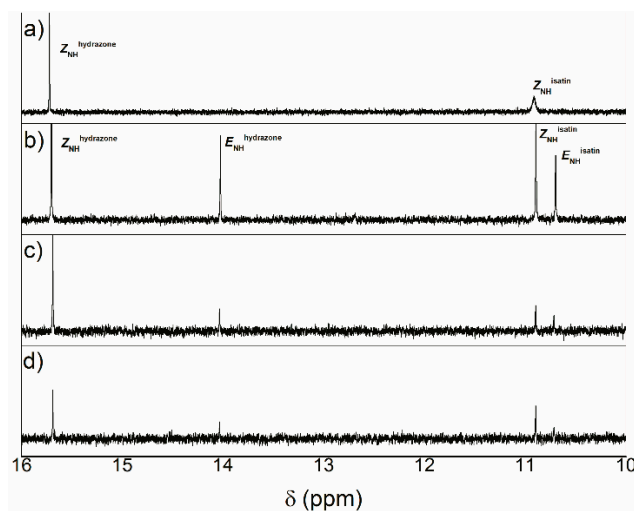

**Figure S8.** Hydrazone 3 *E* and *Z* isomers ( $1 \times 10^{-3} \text{ mol dm}^{-3}$ )  $^1\text{H-NMR}$  spectrum change during H-D hydrogen exchange in DMSO: (a) *Z*-isomer from hydrazone 3; (b) a mixture of *Z* and *E* isomers from hydrazone 3; (c) solution b + 3 drops of  $\text{D}_2\text{O}$ ; (d) solution c after 1 h.

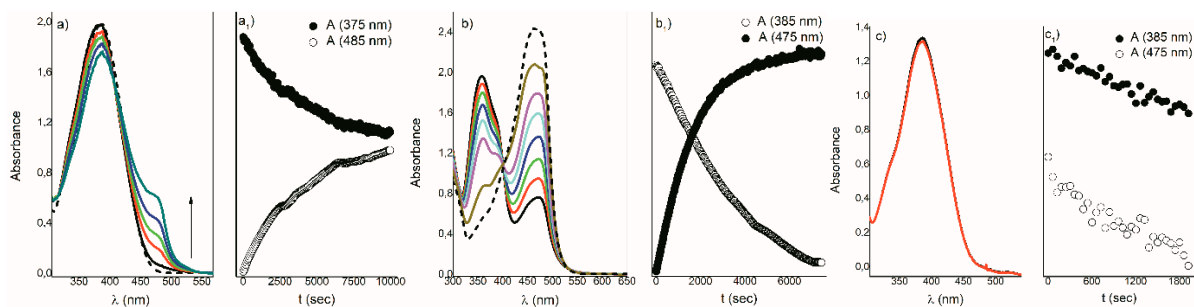

**Figure S9.** Hydrazone 1 reaction kinetics in the TBAF presence in DMSO: (a), (a<sub>1</sub>) initial concentration TBAF  $c_{\text{TBAF}} = 1 \times 10^{-3} \text{ mol dm}^{-3}$ ; (b), (b<sub>1</sub>) TBAF concentration increased to  $c_{\text{TBAF}} = 5 \times 10^{-2} \text{ mol dm}^{-3}$ ; (c), (c<sub>1</sub>) -TBAF diluted to  $c_{\text{TBAF}} = 1 \times 10^{-3} \text{ mol dm}^{-3}$ .

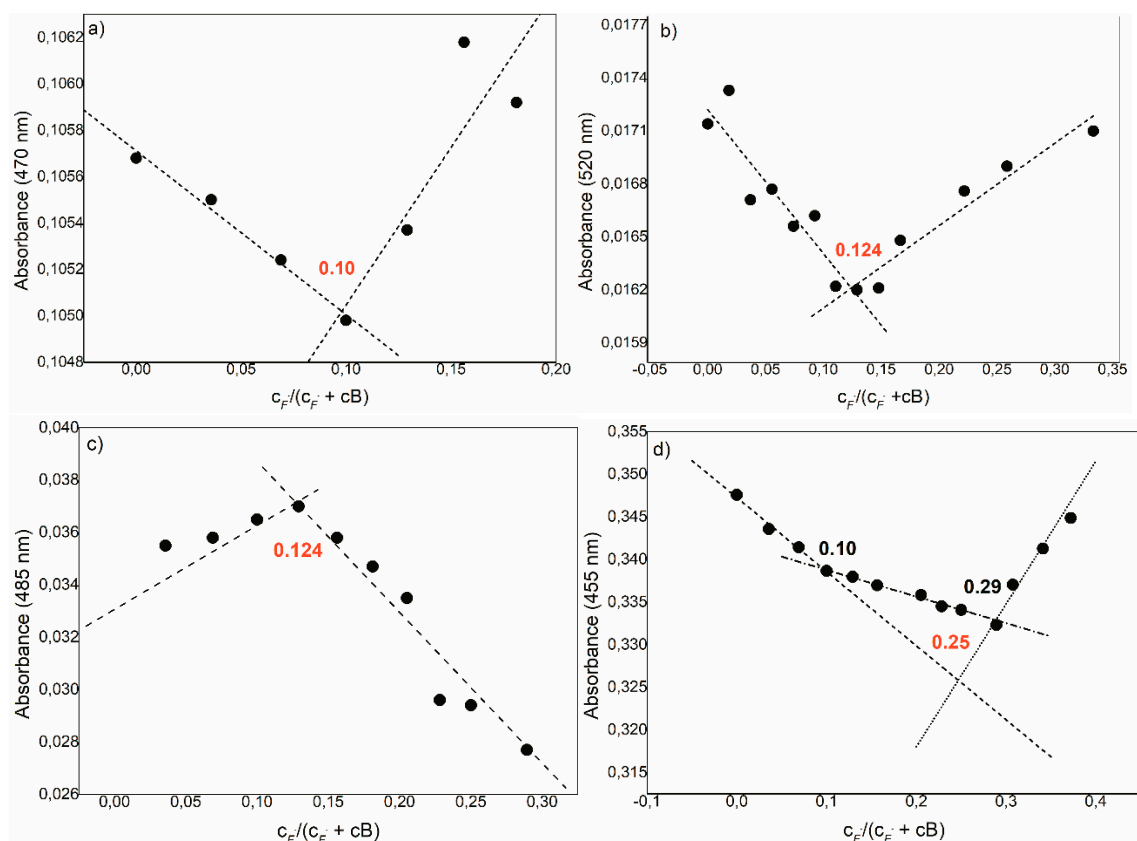

**Figure S10.** Job's plots for: (a) hydrazone 1; (b) hydrazone 2; (c) hydrazone 3; (d) hydrazone 4 in DMF. Titration with TBAF.

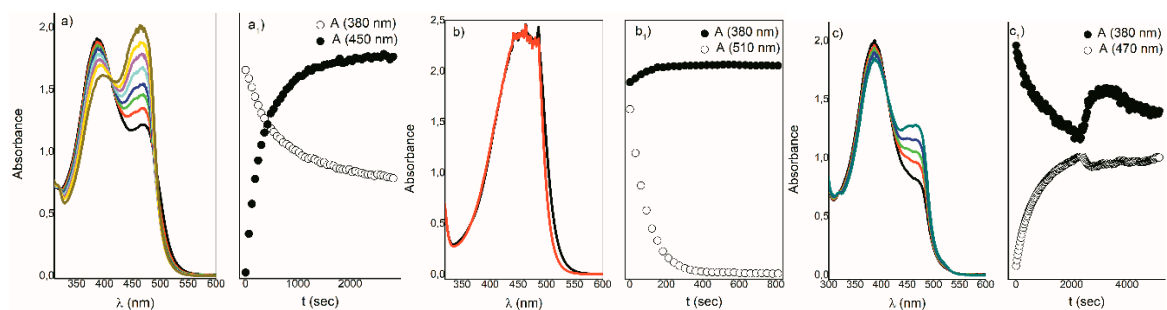

**Figure S11.** Hydrazone 2 reaction kinetics in the TBAF presence in DMSO: (a), (a<sub>1</sub>) - initial concentration TBAF  $c_{\text{TBAF}} = 1 \times 10^{-3} \text{ mol dm}^{-3}$ ; (b), (b<sub>1</sub>) - TBAF concentration increased to  $c_{\text{TBAF}} = 2 \times 10^{-2} \text{ mol dm}^{-3}$ ; (c), (c<sub>1</sub>) - TBAF diluted to  $c_{\text{TBAF}} = 1 \times 10^{-3} \text{ mol dm}^{-3}$ .

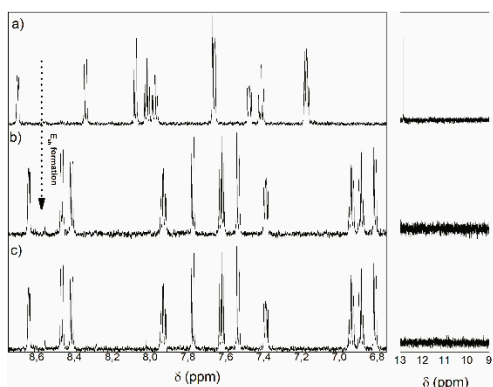

**Figure S12.** Z-isomer of hydrazone 2 ( $1 \times 10^{-3} \text{ mol dm}^{-3}$ )  $^1\text{H-NMR}$  spectra change in DMSO at TBAF ( $2 \times 10^{-2} \text{ mol dm}^{-3}$ ) presence: (a) hydrazone 2 Z-isomer; (b) immediately after TBAF addition - E-isomer of hydrazone 2 formation from  $E_{mah}$ ; (c) after 3 h since TBAF addition.

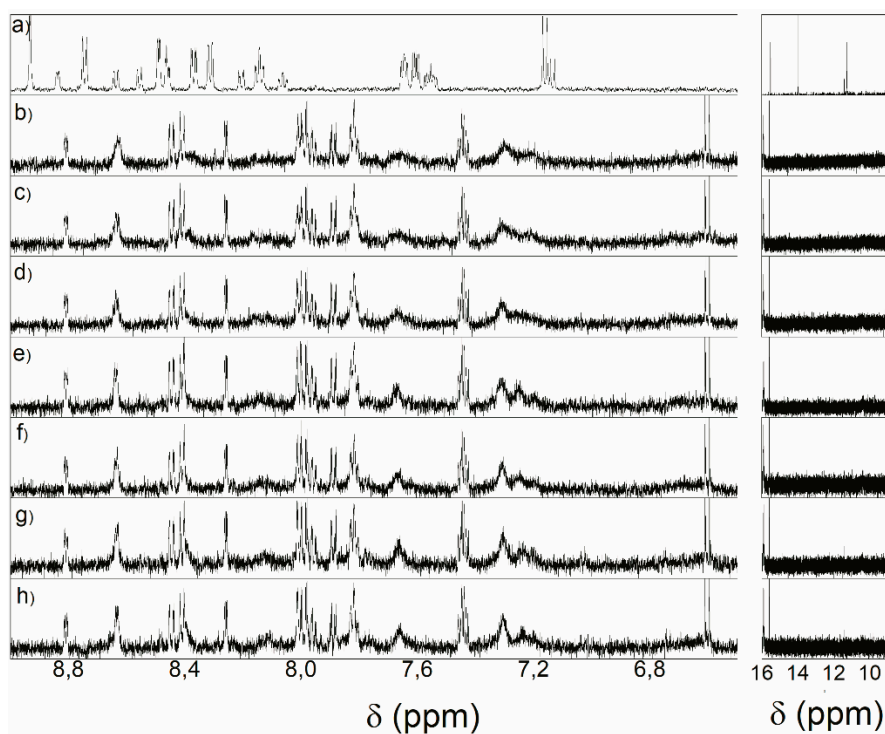

**Figure S13.** System hydrazone 4 ( $1 \times 10^{-3} \text{ mol dm}^{-3}$ ) + TBAF ( $1 \times 10^{-3} \text{ mol dm}^{-3}$ )  $^1\text{H-NMR}$  spectra changes as the time function in DMSO.

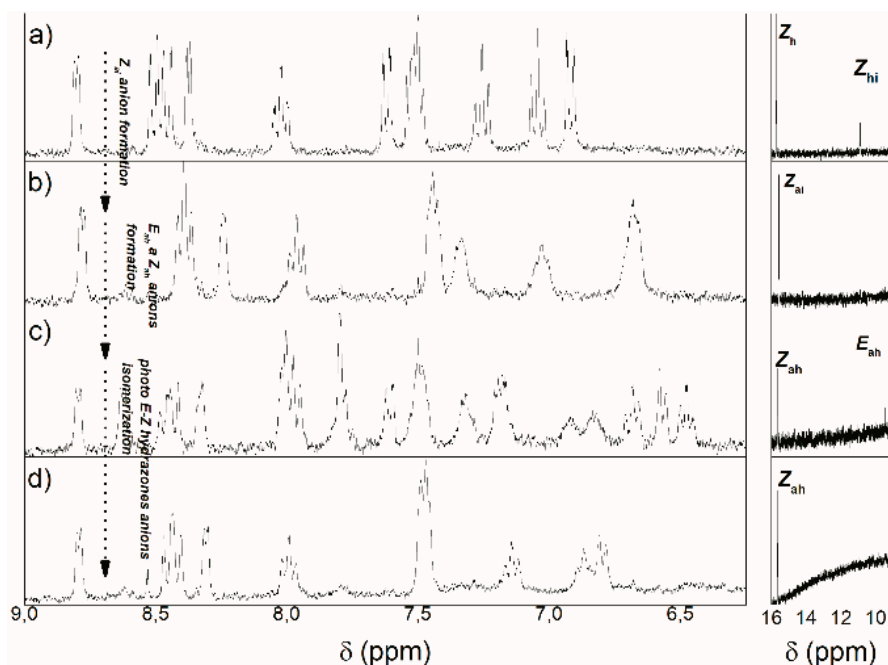

**Figure S14.** Hydrazone 3 thermally and photochemically stimulated change of  $^1\text{H-NMR}$  spectrum ( $1 \times 10^{-3} \text{ mol dm}^{-3}$ ) + TBAF in DMF: (a) without TBAF; (b) with TBAF ( $1 \times 10^{-3} \text{ mol dm}^{-3}$ ); (c) solution b) after 3 h; (d) solution c) irradiated 20 min. with light 465 nm.

**Table S1.** Calculated Gibbs energies [M062x 6-31+g(dp)] level (T = 298.15 K) for *E* and *Z* isomers of studied hydrazones and their tautomeric forms.

| <i>Z</i> isomer | Compound                                                                            | $\Delta G/ \Delta G_{DMF}$<br><i>kJ.mol<sup>-1</sup></i> | $\Delta G/ \Delta G_{DMF}$<br><i>kJ.mol<sup>-1</sup></i> | Compound                                                                              | <i>E</i> isomer |
|-----------------|-------------------------------------------------------------------------------------|----------------------------------------------------------|----------------------------------------------------------|---------------------------------------------------------------------------------------|-----------------|
|                 | 1                                                                                   |                                                          |                                                          | 1                                                                                     |                 |
| <i>Z-1</i>      | 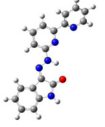   | 0/0                                                      | 19.7/10.7                                                |    | <i>E-1</i>      |
| <i>Z-1-c1</i>   |    | 16.7/8.6                                                 | 21.5/13.6                                                |    | <i>E-1-t1</i>   |
| <i>Z-1-t1</i>   |    | 40.0                                                     | 31.2                                                     |    | <i>E-1-t2</i>   |
| <i>Z-1-t2</i>   |    | 45.3                                                     | 55.1                                                     |    | <i>E-1-c1</i>   |
|                 |                                                                                     |                                                          | 74.1                                                     |  | <i>E-1-t3</i>   |
| <i>Z-1-t3</i>   |  | 57.9                                                     | 78.0                                                     |  | <i>E-1-t4</i>   |
| <i>Z-1-t4</i>   |  | 69.2                                                     | 83.4                                                     |  | <i>E-1-t5</i>   |

|               | 3                                                                                   |           |          | 3                                                                                    |               |
|---------------|-------------------------------------------------------------------------------------|-----------|----------|--------------------------------------------------------------------------------------|---------------|
| <i>Z-3</i>    | 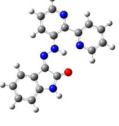 | 0/0       | 14.8/3.4 |  | <i>E-3</i>    |
| <i>Z-3-c1</i> |  | 34.7/18.7 | 57.4     |  | <i>E-3-c1</i> |
| <i>Z-3-t1</i> |  | 56.3      | 90.8     |  | <i>E-3-t1</i> |

|                    |                                                                                   |       |       |                                                                                    |                    |
|--------------------|-----------------------------------------------------------------------------------|-------|-------|------------------------------------------------------------------------------------|--------------------|
| Z-3-t <sub>2</sub> | 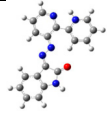 | 99.9  | 96.9  |  | E-3-t <sub>2</sub> |
| -                  | -                                                                                 | -     | 113.7 |  | E-3-t <sub>3</sub> |
|                    | 4                                                                                 |       |       | 4                                                                                  |                    |
| Z-4                |  | 21.3  | 0.0   |  | E-4                |
| Z-4-t <sub>1</sub> |  | 68.3  |       |                                                                                    |                    |
| Z-4-t <sub>2</sub> |  | 127.2 |       |                                                                                    |                    |

**Table S2.** Calculated Gibbs energies [M062x 6-31+g(dp)] level (T = 298.15 K) for E and Z isomers anions of studied hydrazones.

| <i>Anion Zisomer</i> | Compound                                                                            | $\Delta G/\Delta G_{\text{DMF}}$<br><i>kJ.mol<sup>-1</sup></i> | $\Delta G/\Delta G_{\text{DMF}}$<br><i>kJ.mol<sup>-1</sup></i> | Compound                                                                             | <i>Anion Eisomer</i> |
|----------------------|-------------------------------------------------------------------------------------|----------------------------------------------------------------|----------------------------------------------------------------|--------------------------------------------------------------------------------------|----------------------|
|                      | 3                                                                                   |                                                                |                                                                | 3                                                                                    |                      |
| Z-3-A <sub>1i</sub>  | 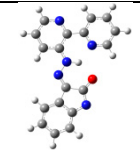 | 3.6/5.0                                                        | 0.0/0.0                                                        |  | E-3-A <sub>1i</sub>  |
| Z-3-A <sub>1h</sub>  |  | 14.4/21.5                                                      | 5.6/39.5                                                       |  | E-3-A <sub>1h</sub>  |
| Z-3-A <sub>2h</sub>  |  | 31,4/16.1                                                      | 34.7/15.9                                                      |  | E-3-A <sub>2h</sub>  |
